# Supplementary material for: Studying both patient and staff experience to investigate their perceptions and to target key interactions to improve: a scoping review
Source: PubMed Central journal article supplement — BMJ Open. 2022 Oct 10;12(10):e061155. doi: 10.1136/bmjopen-2022-061155 (PMC9557797; doi:10.1136/bmjopen-2022-061155), 2022-10-10
Supplement: bmjopen-2022-061155supp001.pdf [file bmjopen-2022-061155supp001.pdf]

## APPENDIX

### Appendix 1. Detail search query in PubMed

Search: (((((((((((("patient experience"[Title/Abstract] AND "staff

experience"[Title/Abstract]) OR "patient experience"[Title/Abstract]) AND "employee

experience"[Title/Abstract]) OR "patient experience"[Title/Abstract]) AND "clinician

experience"[Title/Abstract]) OR "patient experience"[Title/Abstract]) AND "physician

experience"[Title/Abstract]) OR "patient experience"[Title/Abstract]) AND "professional

experience"[Title/Abstract]) OR "patient experience"[Title/Abstract]) AND "workforce

experience"[Title/Abstract]) OR "patient experience"[Title/Abstract]) AND "professional

patient relations"[MeSH Terms] Filters: from 2007/1/1 - 2021/7/21
